# Supplementary material
Source: PubMed Central journal article supplement (PMC3247808)

**Length = 1000 codons**

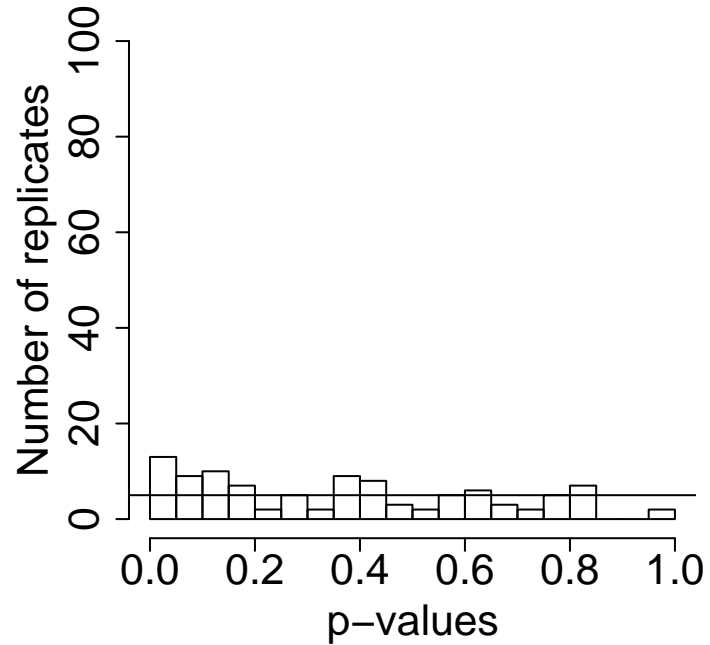

**Length = 2000 codons**

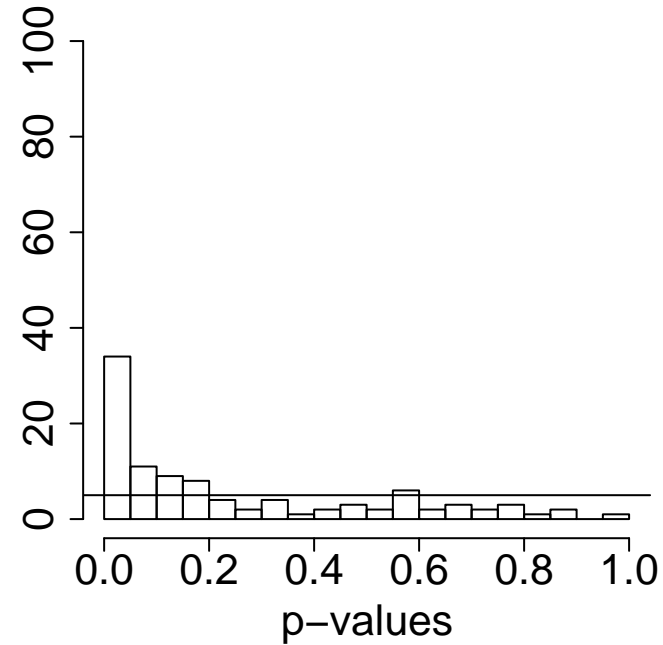

**Length = 5000 codons**

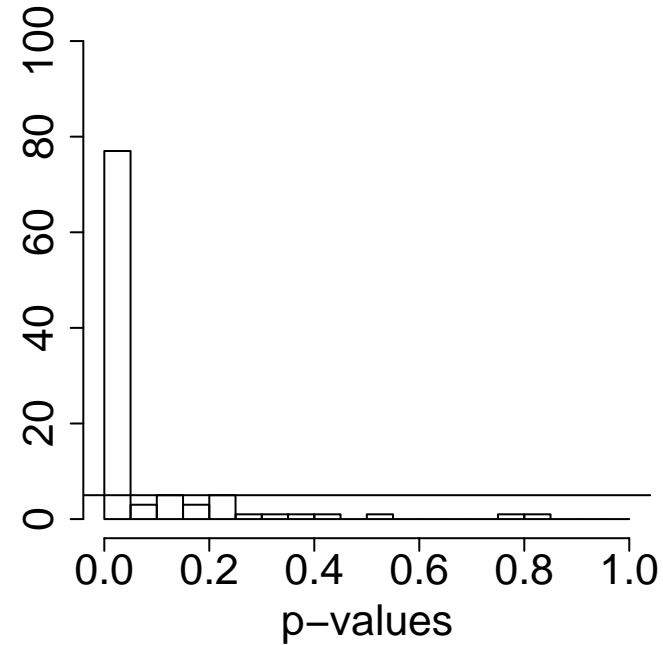

**Length = 10000 codons**

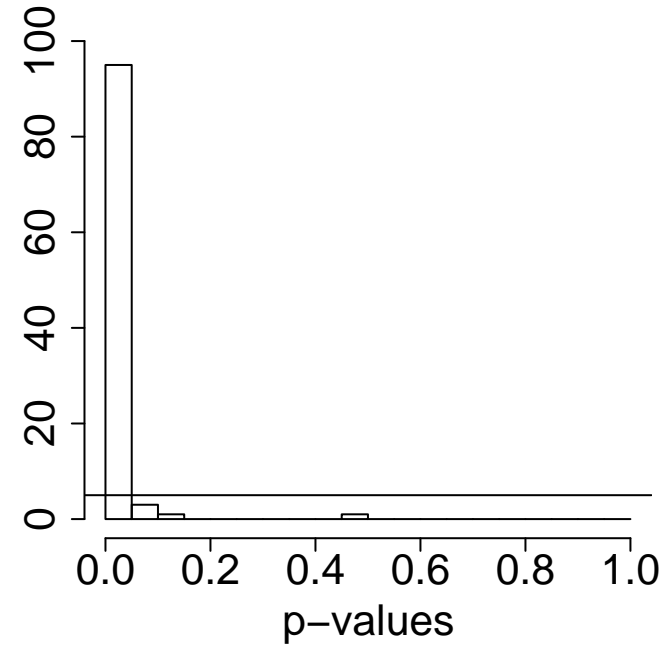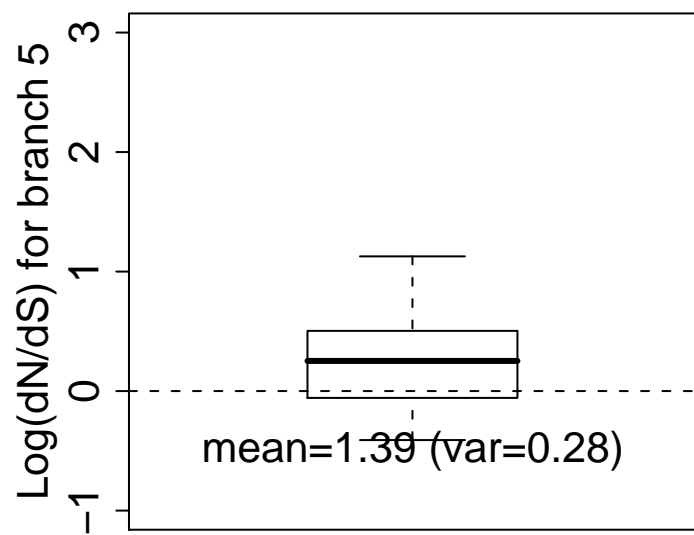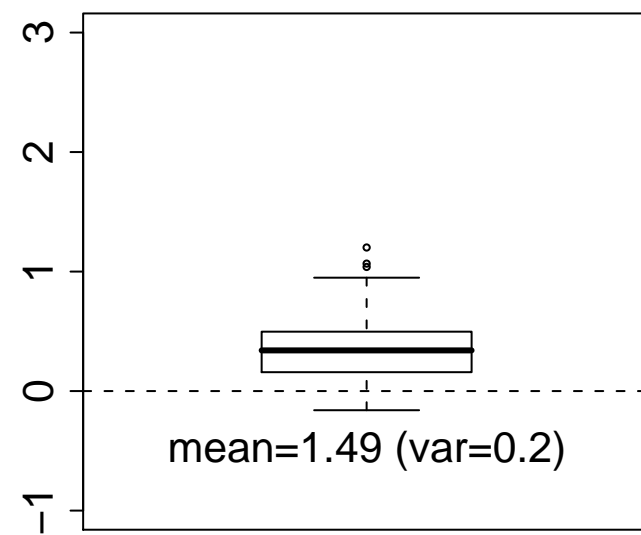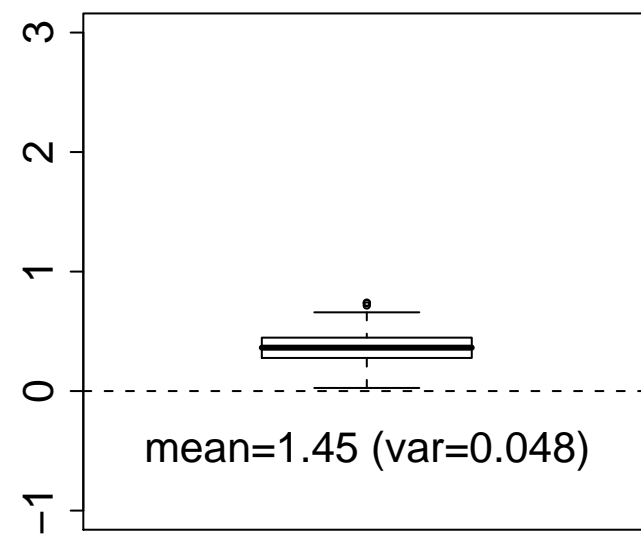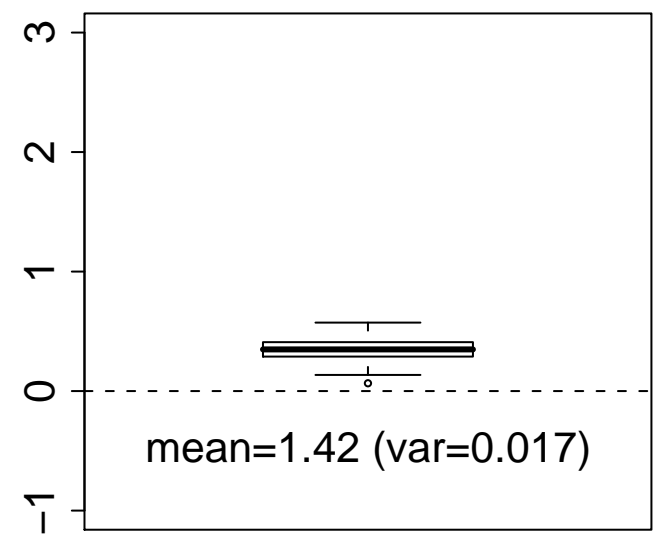

Supplement: supp_msr125_SuppFig1.pdf [file supp_msr125_SuppFig1.pdf]

**Length = 1000 codons**

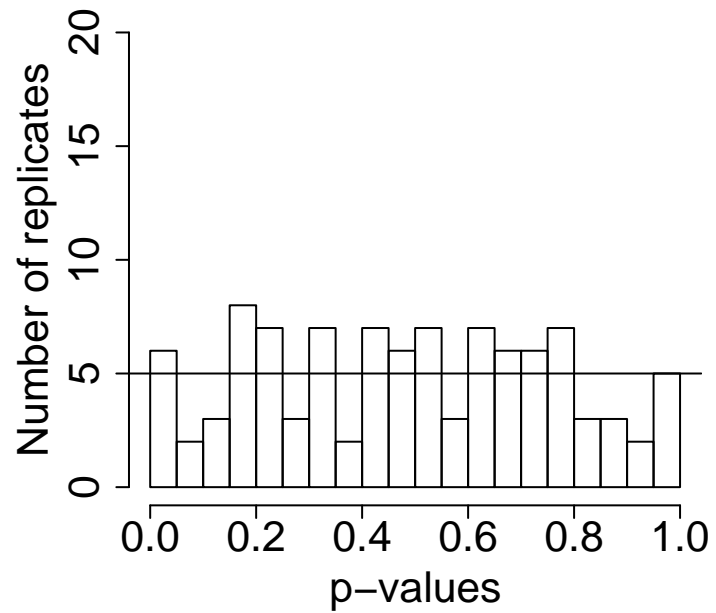

**Length = 2000 codons**

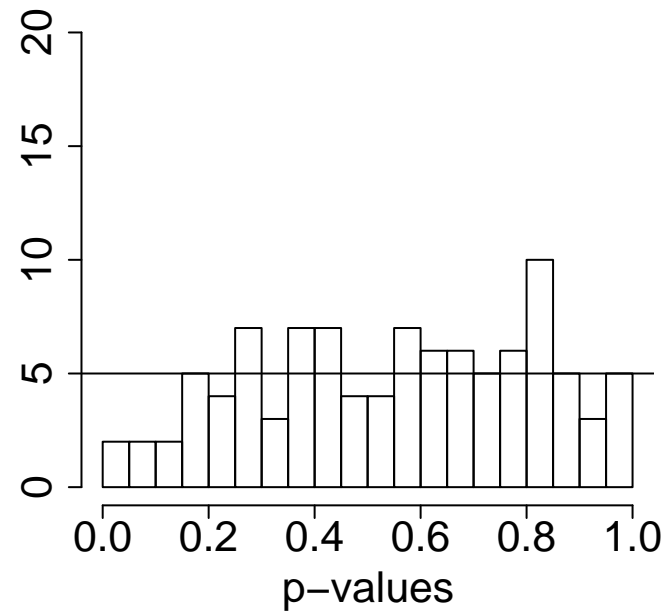

**Length = 5000 codons**

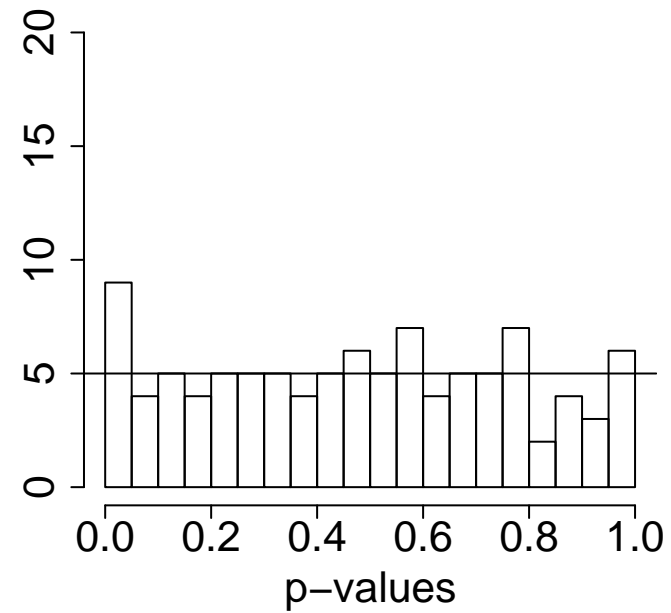

**Length = 10000 codons**

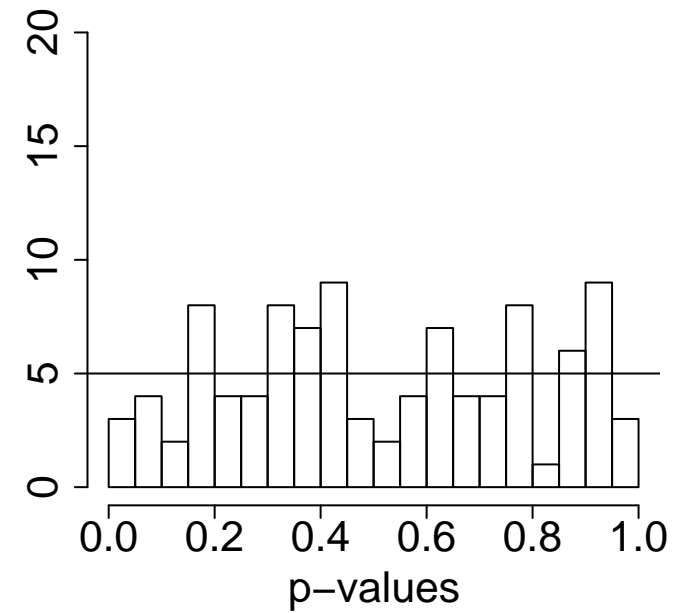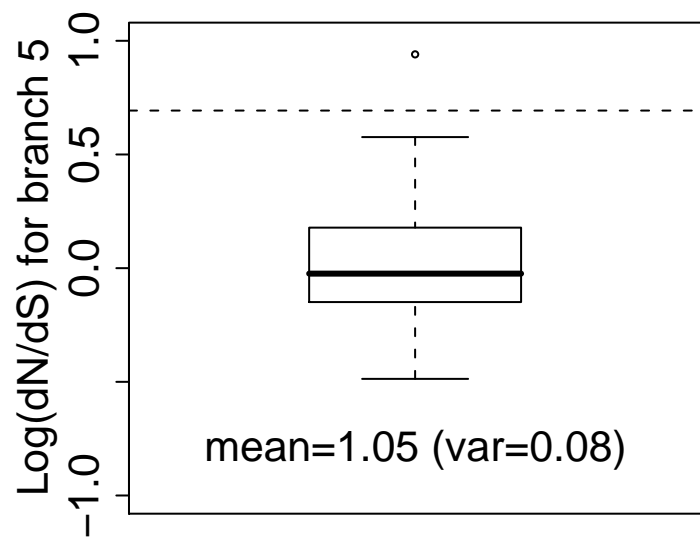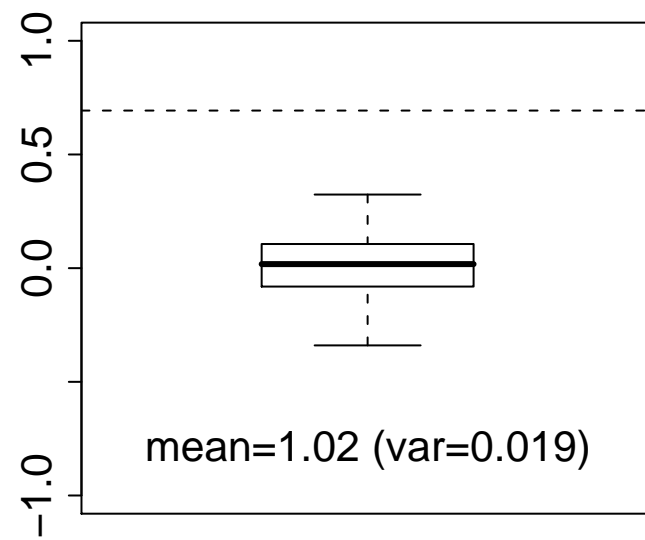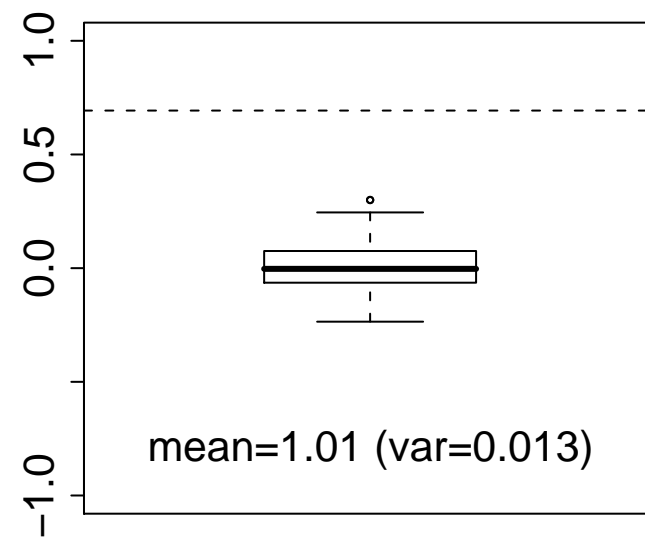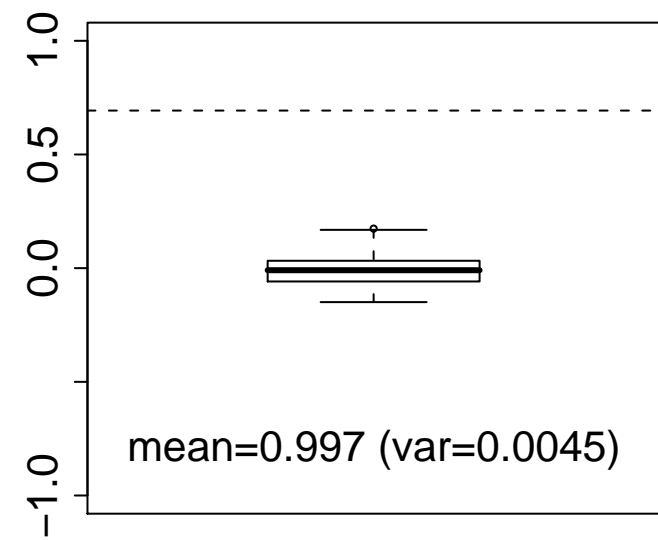

Supplement: supp_msr125_SuppFig2.pdf [file supp_msr125_SuppFig2.pdf]

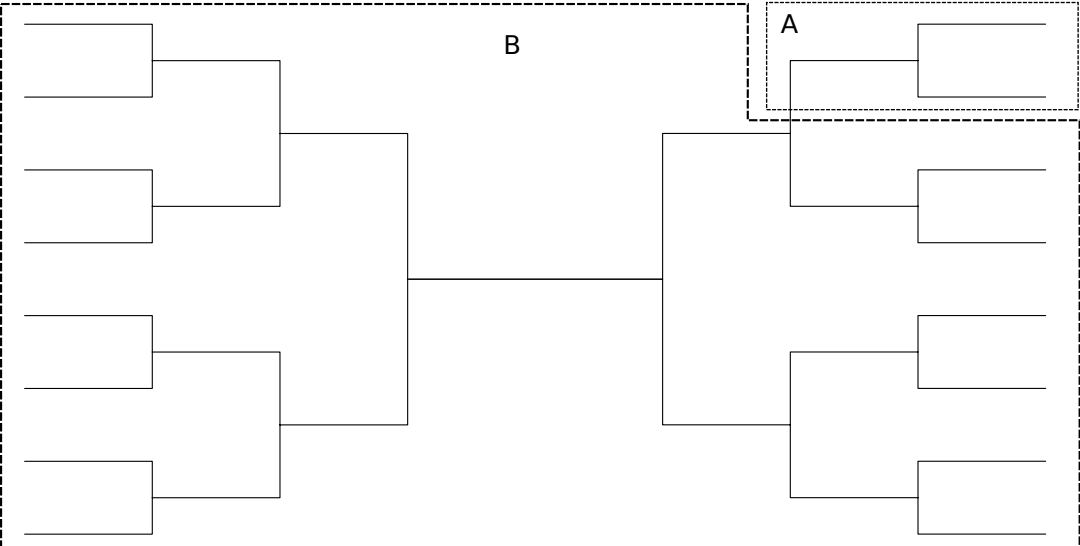

0.8

0.05 0.15

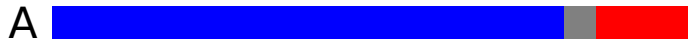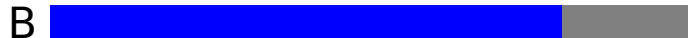

$\omega_-$

Purifying selection

$\omega_N$

Neutral selection

$\omega_+$

Diversifying selection

Supplement: supp_msr125_SuppFig3.pdf [file supp_msr125_SuppFig3.pdf]
